# Supplementary material for: Mild Renal Insufficiency and Attributable Risk of Adverse In-hospital Outcomes in Patients with ACS from the Improving Care for Cardiovascular Disease in China (CCC) Project
Source: Research Square preprint supplement (doi:10.21203/rs.3.rs-503659/v1), 2021-06-21
Supplement: Supplementary file 1 [file 49b7d32eafc466a01ceba110.docx]

**Table S1** Baseline characteristics of STEMI and NSTE-ACS patients

| STEMI | | | | | | | | NSTE-ACS | | | | | | |
| --- | --- | --- | --- | --- | --- | --- | --- | --- | --- | --- | --- | --- | --- | --- |
|  | Total  （n=55574 ） | eGFR≥90ml/min·1.73m2  （n=27154,  48.86%） | eGFR60-89 ml/min·1.73m2  （n=19425,  34.95%） | eGFR45-59 ml/min·1.73m2  （n=4809,  8.65%） | eGFR30-44 ml/min·1.73m2  （n=2667,  4.80%） | eGFR＜  30 ml/min·1.73m2  （n=1519,  2.73%） | P value | Total  （n=36933 ） | eGFR≥90ml/min·1.73m2  （n=15352,  41.57%） | eGFR60-89 ml/min·1.73m2  （n=14037,  38.00%） | eGFR45-59 ml/min·1.73m2  （n=3574,  9.68%） | eGFR30-44 ml/min·1.73m2  （n=2313,  6.26%） | eGFR＜  30 ml/min·1.73m2  （n=1657,  4.49%） | P value |
| Male gender | 43251 (77.8) | 22743（83.8） | 14579（75.1） | 3279（68.2） | 1701（63.8） | 949（62.5） | ＜0.001 | 25119（68.0） | 11293（73.6） | 9416（67.1） | 1391（38.9） | 1009（43.6） | 734（44.3） | ＜0.001 |
| Age(years) | 61.89±12.64 | 55.70±10.59 | 66.49±11.36 | 70.21±11.71 | 71.42±11.71 | 70.60±12.00 | ＜0.001 | 65.19±11.89 | 58.12±9.74 | 68.81±10.36 | 72.54±10.23 | 73.67±10.90 | 72.31±11.45 | ＜0.001 |
| Previous MI | 3003（5.4） | 1238（4.6） | 1144 (5.9) | 318（6.6） | 188（7.0） | 115（7.4） | ＜0.001 | 4558（12.3） | 1505（9.8） | 1752 (12.5) | 565（15.8） | 403（17.4） | 333（20.1） | ＜0.001 |
| Previous PCI or CABG | 2663（4.8） | 1147（4.2） | 1036 （5.3） | 247（5.1） | 153（5.7） | 80（5.3） | ＜0.001 | 5081（13.8） | 1837（12.0） | 2074 （14.8） | 557（15.6） | 355（15.3） | 258（15.6） | ＜0.001 |
| Family history of CAD | 1433（2.6） | 820（3.0） | 472 (2.4) | 74（1.5） | 40（1.5） | 27（1.8） | ＜0.001 | 1048（2.8） | 534（3.5） | 353 (2.5) | 85（2.4） | 38（1.6） | 38（2.3） | ＜0.001 |
| Previous AF | 791（1.4） | 169（0.6） | 356 (1.8) | 134（2.8） | 82（3.1） | 50（3.3） | ＜0.001 | 1438（3.9） | 240（1.6） | 607(4.3) | 242（6.8） | 201（8.7） | 148（8.9） | ＜0.001 |
| Hypertension | 34275（61.7） | 15492 （57.1） | 12441 (64.1) | 3303（68.7） | 1893（71.0） | 1146（75.5） | ＜0.001 | 26821（72.6） | 10185（66.3） | 10432 (74.3) | 2891（80.9） | 1881（81.3） | 1432（86.4） | ＜0.001 |
| Hyperlipidemia | 48532（87.3） | 24099 (88.7) | 16934 (87.2) | 4076（84.8） | 2226（83.5） | 1197（78.8） | ＜0.001 | 30886（83.6） | 13023 (84.8) | 11705 (83.4) | 2960（82.8） | 1898（82.1） | 1300（78.5） | ＜0.001 |
| Diabetes | 14309（25.7） | 6664（24.5） | 4755 (24.5) | 1442（30.0） | 886（33.2） | 562（37.0） | ＜0.001 | 11630（31.5） | 4433（28.9） | 4145 (29.5) | 1251（35.0） | 980（42.4） | 821（49.5） | ＜0.001 |
| Previous stroke | 4485（8.1） | 1531（5.6） | 1804 (9.3) | 573（11.9） | 374（14.0） | 203（13.4） | ＜0.001 | 3902（10.6） | 1109（7.2） | 1544 (11.0) | 555（15.5） | 389（16.8） | 305（18.4） | ＜0.001 |
| Previous heart failure | 497（0.9） | 90 （0.3） | 163 (0.8) | 93（1.9） | 76（2.8） | 75（4.9） | ＜0.001 | 1573（4.3） | 206 （1.3） | 606 (4.3) | 277（7.8） | 236（10.2） | 248（15.0） | ＜0.001 |
| Cigarette smoking | 26797（48.2） | 15203（56.0） | 8495 (43.7) | 1739（36.2） | 906（34.0） | 454（29.9） | ＜0.001 | 392（23.7） | 6856 （44.7） | 4734 (33.7) | 979（27.4） | 576（24.9） | 392（23.7） | ＜0.001 |
| Statins before admission | 6785（12.2） | 3177（11.7） | 2462 (12.7) | 564（11.7） | 356（13.3） | 226（14.9） | ＜0.001 | 9519（25.8） | 3640（23.7） | 3722 (26.5) | 989（27.7） | 687（29.7） | 481（29.0） | ＜0.001 |
| Antiplatelet drugs before admission | 10652（19.2） | 5023（18.5） | 3834 (19.7) | 925（19.2） | 536（20.1） | 334（22.0） | ＜0.001 | 12007（32.5） | 4579（29.8） | 4722 (33.6) | 1262（35.3） | 833（36.0） | 611（36.9） | ＜0.001 |
| β-blocker before admission | 3362（6.0） | 1541（5.7） | 1261（6.5） | 303（6.3） | 135（5.1） | 122（8.0） | ＜0.001 | 5511（14.9） | 2058（13.4） | 2188（15.6） | 573（16.0） | 399（17.3） | 293（17.7） | ＜0.001 |
| ACEI/ARB before admission | 3900（7.0） | 1654（6.1） | 1466（7.5） | 421（8.8） | 226（8.5） | 133（8.8） | ＜0.001 | 5796（15.7） | 2008（13.1） | 2353（16.8） | 725（20.3） | 448（19.4） | 262（15.8） | ＜0.001 |
| Heart failure on admission | 4087（7.4） | 1142（4.2） | 1524 (7.8) | 608（12.6） | 451（16.9） | 362（23.8） | ＜0.001 | 2523（6.8） | 403（2.6） | 925 (6.6) | 438（12.3） | 394（17.0） | 363（21.9） | ＜0.001 |
| Cardiac arrest on admission | 1220（2.2） | 394（1.5） | 454 (2.3) | 164（3.4） | 132（4.9） | 76（5.0） | ＜0.001 | 229（0.6） | 61 （0.4） | 75 (05) | 33（0.9） | 33（1.4） | 27（1.6） | ＜0.001 |
| Cardiogenic shock on admission | 2096（3.8） | 544 （2.0） | 727 (3.7) | 363（7.5） | 278（10.4） | 184（12.1） | ＜0.001 | 2523（6.8） | 403 （2.6） | 925 (6.6) | 438（12.3） | 394（17.0） | 363（21.9） | ＜0.001 |
| SBP on admission (mmHg) | 127.4±23.4 | 27.9±22.0 | 127.7±23.5 | 125.7±25.8 | 124.5±27.5 | 126.6±29.6 | 0.001 | 135.5±22.8 | 134.2±21.4 | 136.0±22.6 | 136.9±23.8 | 136.4±26.2 | 139.3±27.8 | 0.001 |
| DBP on admission (mmHg) | 77.8±14.8 | 79.4±14.3 | 77.1±14.4 | 75.2±15.7 | 73.8±16.2 | 74.8±17.4 | ＜0.001 | 79.0±13.7 | 80.6±13.3 | 78.2±13.4 | 77.8±14.4 | 77.1±14.9 | 76.9±15.8 | ＜0.001 |
| HR on admission (bpm) | 78.1±16.5 | 77.7±15.0 | 77.6±16.6 | 79.5±19.3 | 80.2±20.8 | 81.6±22.0 | ＜0.001 | 76.7±15.7 | 74.9±13.6 | 76.3±15.6 | 78.7±18.0 | 82.4±19.8 | 83.6±19.4 | ＜0.001 |
| Killip class≥3 | 5289 (9.5) | 1365（5.0） | 1945 (10.0) | 850（17.7） | 664（24.9） | 465（30.6） | ＜0.001 | 4367 (11.8) | 936 （6.1） | 1630 (11.6) | 701（19.6） | 546（23.6） | 554（33.4） | ＜0.001 |
| eGFR on admission (ml/min·1.73m2) | 88.0 (68.3-99.8) | 101.5（95.8-108.7） | 78.9（70.5-85.2） | 53.62  (49.57-57.04) | 38.66  (35.03-42.01) | 21.81  (14.47-26.27) | ＜0.001 | 88.0 (68.3-99.8) | 99.7（94.8-106.2） | 78.6（69.8-85.0） | 53.44  (49.35-56.72) | 38.60  (34.68-41.94) | 20.62  (13.36-25.68) | ＜0.001 |
| HBA1C，(%)* | 6.1（5.6-7.2） | 6.0 (5.5-7.3) | 6.0 (5.6-7.0) | 6.1 (5.7-7.2) | 6.3 (5.7-7.5) | 6.4(5.8-7.9) | ＜0.001 | 6.1（5.6-7.2） | 6.1 (5.6-7.3) | 6.1 (5.7-7.1) | 6.2 (5.7-7.4) | 6.4(5.7-7.7) | 6.4(5.7-7.5) | ＜0.001 |
| HB on admission (g/L) | 137.7±20.3 | 142.3±18.6 | 136.0±19.4 | 131.4±20.7 | 126.7±21.8 | 117.8±25.6 | ＜0.001 | 133.5±20.7 | 139.2±18.6 | 133.5±19.0 | 127.3±20.2 | 122.5±22.1 | 109.5±24.9 | ＜0.001 |
| TC (mmol/L) | 4.48±1.22 | 4.56±1.23 | 4.43±1.19 | 4.39±1.23 | 4.32±1.24 | 4.26±1.33 | ＜0.001 | 4.36±1.25 | 4.42±1.24 | 4.32±1.23 | 4.33±1.27 | 4.32±1.35 | 4.21±1.38 | ＜0.001 |
| TG (mmol/L) | 1.44 (1.02-2.14) | 1.51（1.05-2.25） | 1.35（0.96-1.99） | 1.32（0.94-1.93） | 1.35  (0.93-2.03) | 1.39  (1.01-2.05) | ＜0.001 | 1.44 (1.02-2.14) | 1.55（1.10-2.30） | 1.42（1.01-2.08） | 1.46（1.01-2.14） | 1.41  (0.98-2.14) | 1.47  (1.02-2.17) | ＜0.001 |
| LDL-C (mmol/L) | 2.69  (2.08-3.35) | 2.76  (2.19-3.40) | 2.69  (2.12-3.31) | 2.65 (2.05-3.28) | 2.56  (2.02-3.22) | 2.44  (1.86-3.14) | ＜0.001 | 2.69  (2.08-3.35) | 2.61 (2.01-3.27) | 2.54  (1.96-3.21) | 2.54 (1.91-3.22) | 2.54  (1.88-3.25) | 2.40  (1.78-3.13) | ＜0.001 |
| HDL-C (mmol/L) | 1.01  (0.85-1.22) | 1.03  (0.87-1.24) | 1.05  (0.87-1.26) | 1.05 (0.87-1.27) | 1.04  (0.85-1.27) | 1.01（0.82-1.24） | ＜0.001 | 1.01  (0.85-1.22) | 1.03  (0.86-1.24) | 1.04  (0.87-1.25) | 1.03  (0.85-1.26) | 1.02  (0.84-1.27) | 0.98（0.78-1.23） | ＜0.001 |
| Undergoing CA | 45512 (81.9) | 23487(86.5) | 15795 (81.3) | 3572 (74.3) | 1788（67.0） | 870 (57.3) | ＜0.001 | 24850(67.3) | 11556(75.3) | 9445 (67.3) | 2068 (57.9) | 1151（49.8） | 630 (38.0) | ＜0.001 |
| Undergoing PCI | 43566（78.4） | 22459（82.7） | 15148 (78.0) | 3422（71.2） | 1698（63.7） | 839（55.2） | ＜0.001 | 20286（54.9） | 9567 （62.3） | 7651 (54.5) | 1648（46.1） | 913（39.5） | 507（30.6） | ＜0.001 |
| Coronary artery lesions |  |  |  |  |  |  |  |  |  |  |  |  |  |  |
| One-vessel lesion | 37969(68.3) | 18842（69.4） | 12951 (66.7) | 3236 (67.3) | 1558 (48.7) | 766 (46.1) | ＜0.001 | 42416(57.1) | 22254（60.9） | 14695 (54.8) | 3143 (51.9) | 1558 (48.7) | 766 (46.1) | ＜0.001 |
| multi-vessel lesions | 15796(34.7) | 7581（32.3） | 5754 (36.4) | 1384 (38.7) | 729 (40.8) | 348 (40.0) | ＜0.001 | 12598(50.7) | 5438（47.1） | 4950 (52.4) | 1146 (55.4) | 669 (58.1) | 395 (62.7) | ＜0.001 |
| Left main vessel lesions | 1809（4.0） | 731（3.1） | 720 (4.6) | 189（5.3） | 116（6.5） | 53（6.1） | ＜0.001 | 2070（8.3） | 740（6.4） | 861 (9.1) | 221（10.7） | 141（12.3） | 107（17.0） | ＜0.001 |

Values are mean±SD, median(interquartile range, IQ), or n (%).

CKD：chronic kidney disease；eGFR: estimated glomerular filtration rate；ACS：acute coronary syndrome；STEMI：ST-elevation myocardial infarction；NSTEMI：Non-ST elevation myocardial infarction；UA：Unstable angina pectoris；PCI：percutaneous coronary intervention；CABG：coronary artery bypass grafting;；SBP: systolic blood pressure; DBP: diastolic blood pressure; HR: heart rate; ACEI：Angiotensin Converting Enzyme Inhibitors；ARB：Angiotensin receptor antagonist; FBG: fasting blood glucose; HBA1C: glycated hemoglobin; HB:Hemoglobin; TG：triglyceride；TC：total cholesterol；LDL-C：low-density lipoprotein cholesterol；HDL：high-density lipoprotein cholesterol.

HBA1C was not available for 52196(56.4%) patients
