# Supplementary material for: Mild Renal Insufficiency and Attributable Risk of Adverse In-hospital Outcomes in Patients with ACS from the Improving Care for Cardiovascular Disease in China (CCC) Project
Source: Research Square preprint supplement (doi:10.21203/rs.3.rs-503659/v1), 2021-06-21
Supplement: Supplementary file 2 [file 70d964b43bb2a8de831aa026.docx]

**Table S2** In-hospital outcomes of STEMI and NSTE-ACS patients

| STEMI | | | | | | | | NSTE-ACS | | | | | | |
| --- | --- | --- | --- | --- | --- | --- | --- | --- | --- | --- | --- | --- | --- | --- |
|  | Total  （n=55574 ） | eGFR≥90ml/min·1.73m2  （n=27154,  48.86%） | eGFR60-89 ml/min·1.73m2  （n=19425,  34.95%） | eGFR45-59 ml/min·1.73m2  （n=4809,  8.65%） | eGFR30-44 ml/min·1.73m2  （n=2667,  4.80%） | eGFR＜  30 ml/min·1.73m2  （n=1519,  2.73%） | P value | Total  （n=36933 ） | eGFR≥90ml/min·1.73m2  （n=15352,  41.57%） | eGFR60-89 ml/min·1.73m2  （n=14037,  38.00%） | eGFR45-59 ml/min·1.73m2  （n=3574,  9.68%） | eGFR30-44 ml/min·1.73m2  （n=2313,  6.26%） | eGFR＜  30 ml/min·1.73m2  （n=1657,  4.49%） | P value |

| death | 1185（2.1） | | 211（0.8） | | 389（2.0） | | 230（4.8） | 189（7.1） | | 166（10.9） | | ＜0.001 | 433（1.2） | 50（0.3） | 119（0.8） | 80（2.2） | 81（3.5） | | 103（6.2） | ＜0.001 |
| --- | --- | --- | --- | --- | --- | --- | --- | --- | --- | --- | --- | --- | --- | --- | --- | --- | --- | --- | --- | --- |
| Cardiogenic shock | 1942（3.5） | | 485（1.8） | | 665（3.4） | | 322（6.7） | 273（10.2） | | 197（13.0） | | ＜0.001 | 466（1.3） | 74（0.5） | 143（1.0） | 78（2.2） | 87（3.8） | | 84（5.1） | ＜0.001 |
| Heart failure | 4906（8.8） | | 1429（5.3） | | 1864（9.6） | | 716（14.9） | 509（19.1） | | 388（25.5） | | ＜0.001 | 2529（6.8） | 445（2.9） | 906（6.5） | 424（11.9） | 404（17.5） | | 350（21.1） | ＜0.001 |
| Cardiac arrest | 1131（2.0） | | 261（1.0） | | 386（2.0） | | 195（4.1） | 162（6.1） | | 127（8.4） | | ＜0.001 | 328（0.9） | 48（0.3） | 88（0.6） | 60（1.7） | 63（2.7） | | 69（4.2） | ＜0.001 |
|  |  |  | |  | |  | |  |  | |  | |  |  |  |  |  |

Values are median (interquartile range, IQ), or n (%).

ACS：acute coronary syndrome；STEMI：ST-elevation myocardial infarction
